# Supplementary material for: Apc inhibition of Wnt signaling regulates supernumerary tooth formation during embryogenesis and throughout adulthood
Source: Oxford University Press journal article supplement (doi:10.1242/dev.033803), 2009-05-08
Supplement: dev033803tables1.pdf [file dev033803tables1.pdf]

**Table S1. Putative Tcf/Lef binding sites around the mouse and rat *Fgf8* genomic locus**

| Species | Location                               | Sequence (5' to 3') |
|---------|----------------------------------------|---------------------|
| Mouse   | ch19:45809676-86                       | ACTTTGTAGCC         |
| Mouse   | ch19:45814637-47                       | CCTTTGTCCCT         |
| Mouse   | ch19:45814881-91, <i>Fgf8</i> intron 3 | GCTTTGAAGGG         |
| Mouse   | ch19:45819965-75, 3 kb 5' proximal     | GCTTTGATAAG         |
| Mouse   | ch19:45822273-83                       | ACTTTGTACTT         |
| Rat     | ch1:250951300-10                       | CCTTTGCCGTT         |
| Rat     | ch1:250951889-99                       | GCTTTGCTATT         |
| Rat     | ch1:250952313-23                       | GCTTTGCTGTC         |
| Rat     | ch1:250954427-37, <i>Fgf8</i> intron 3 | GCTTTGAAGGG         |
| Rat     | ch1:250959576-86, 3 kb 5' proximal     | GCTTTGATAAG         |
