# Supplementary figures and images for: Apc inhibition of Wnt signaling regulates supernumerary tooth formation during embryogenesis and throughout adulthood
Source: Oxford University Press journal article supplement (doi:10.1242/dev.033803), 2009-05-08

*K14Cre<sup>1Amc</sup>; R26R*

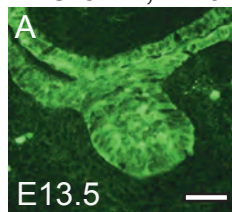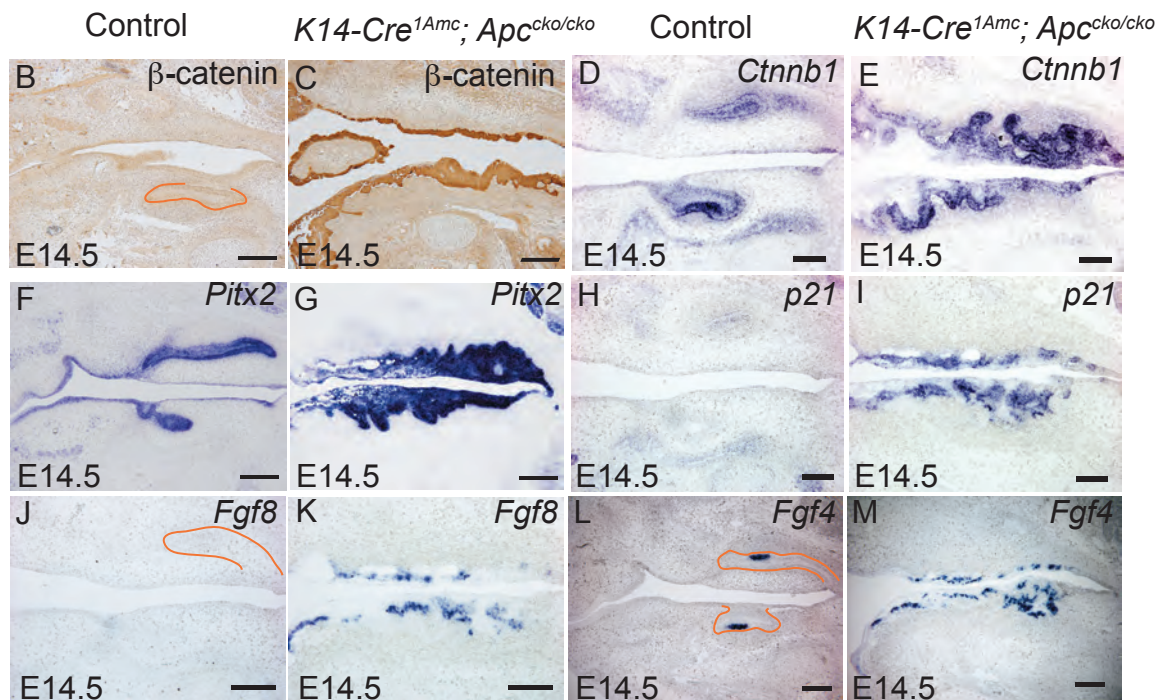

*K14-Cre<sup>1Amc</sup>;  
Apc<sup>cko/cko</sup>*

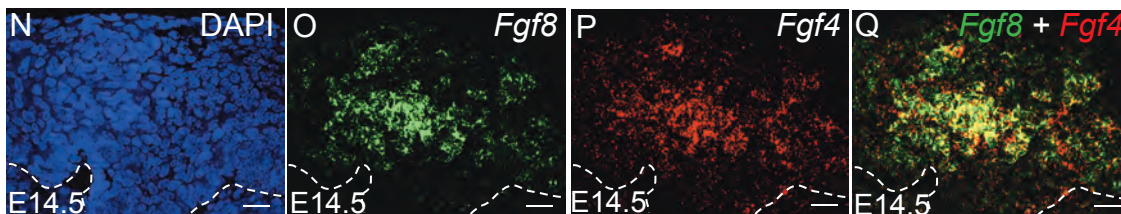

Supplement: dev033803-sup-033803-figs1.pdf [file dev033803-sup-033803-figs1.pdf]

*K14-Cre<sup>8Bm</sup>;*  
*Apc<sup>cko/cko</sup>*

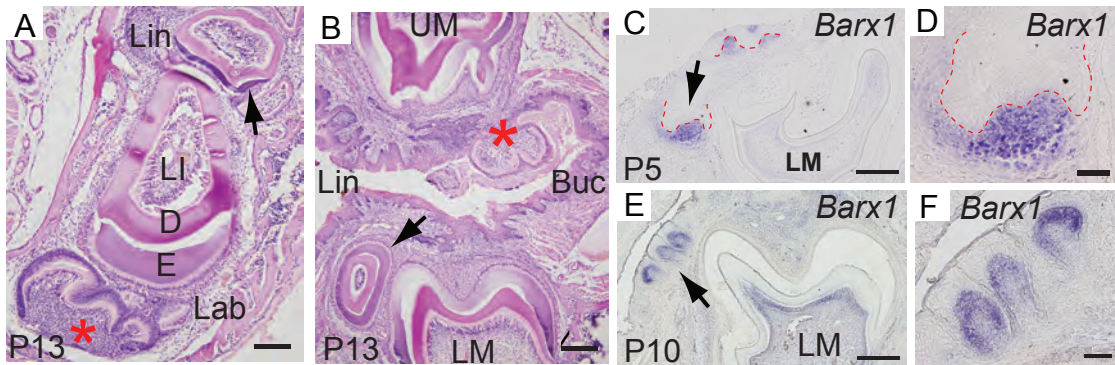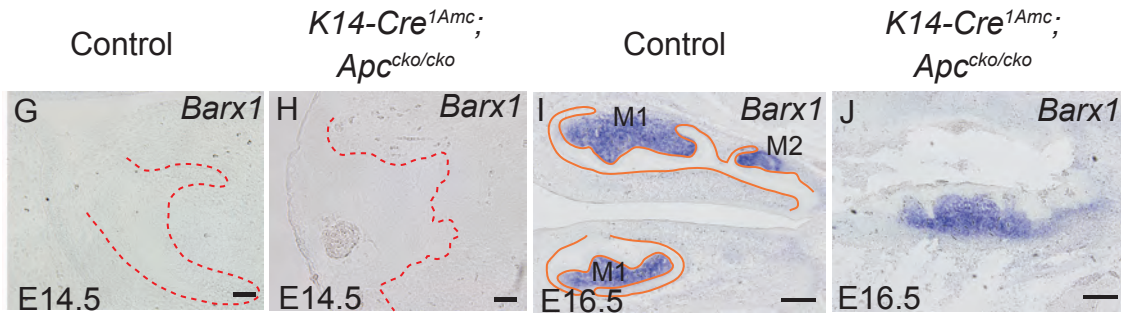

Supplement: dev033803-sup-033803-figs2.pdf [file dev033803-sup-033803-figs2.pdf]

DAPI

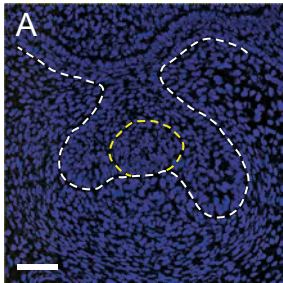

Ki67

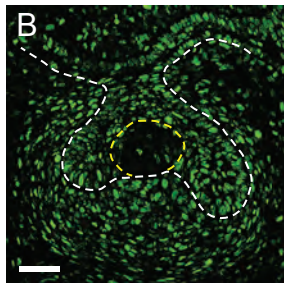

DAPI + Ki67

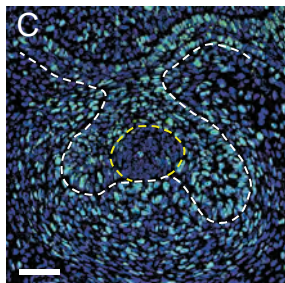

$\beta$ -catenin

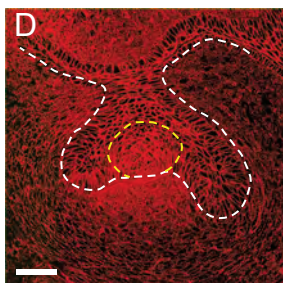

Supplement: dev033803-sup-033803-figs3.pdf [file dev033803-sup-033803-figs3.pdf]

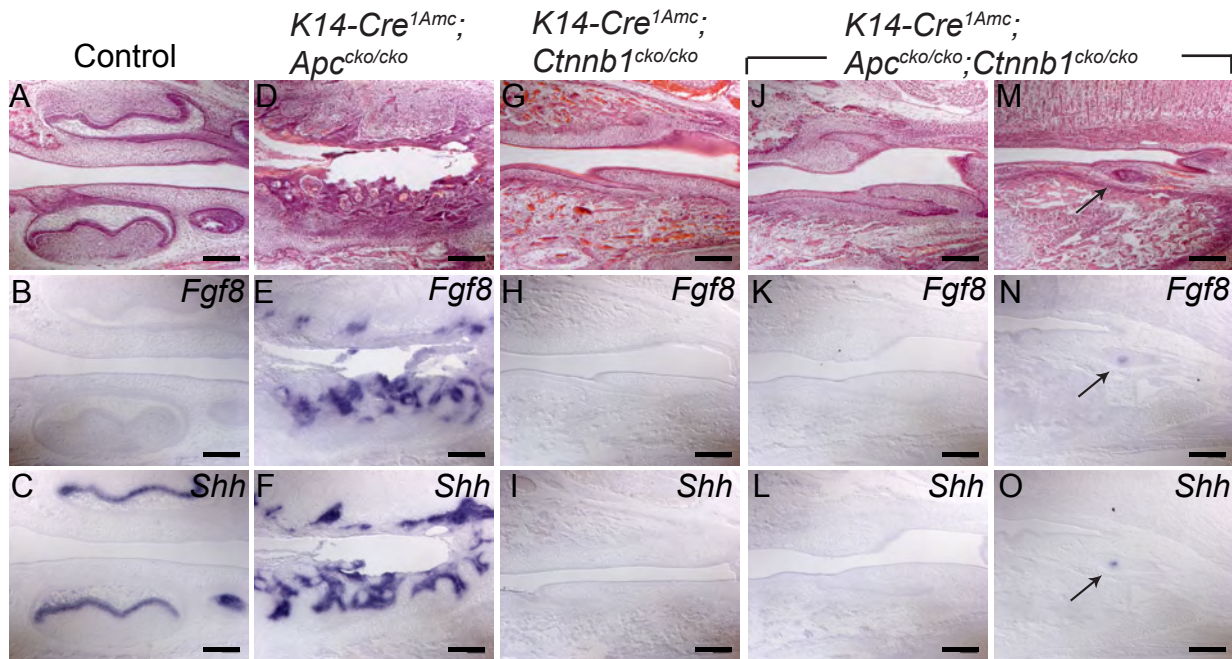

Supplement: dev033803-sup-033803-figs4.pdf [file dev033803-sup-033803-figs4.pdf]

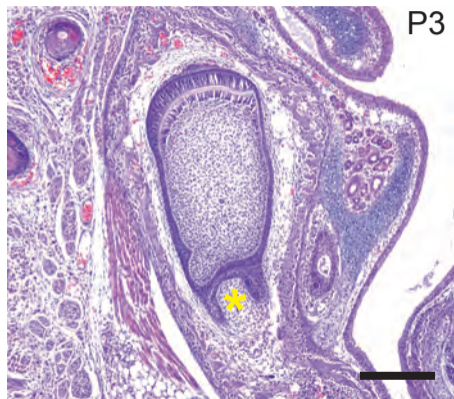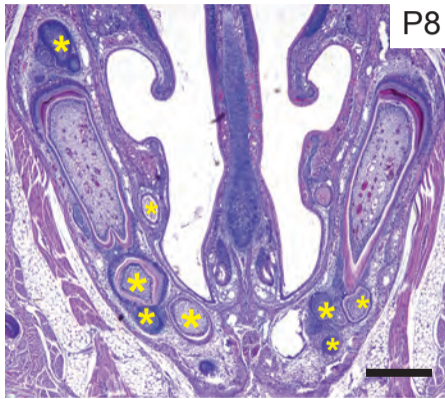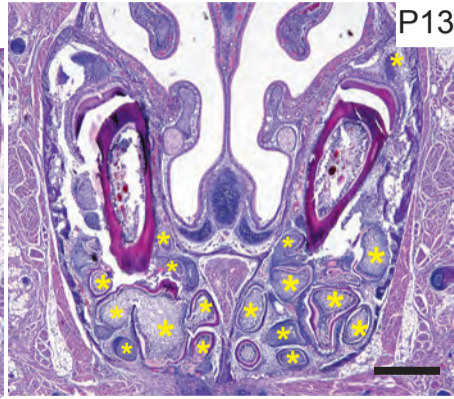

Supplement: dev033803-sup-033803-figs5.pdf [file dev033803-sup-033803-figs5.pdf]

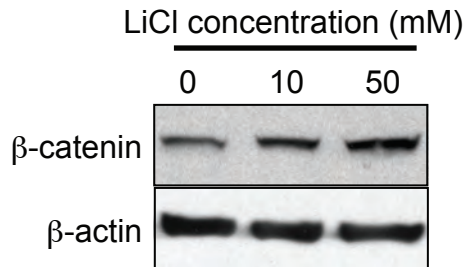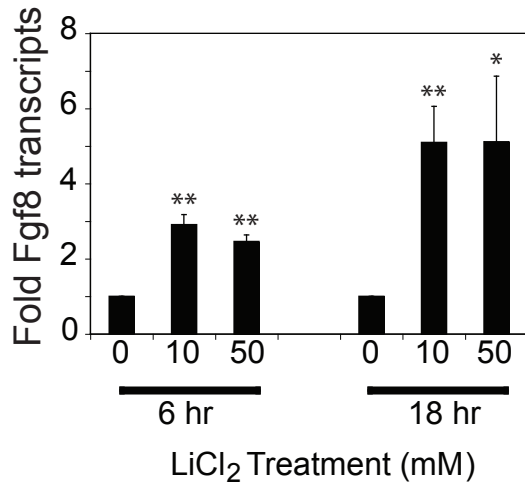

Supplement: dev033803-sup-033803-figs6.pdf [file dev033803-sup-033803-figs6.pdf]
